# Supplementary material for: TcTASV-C, a Protein Family in Trypanosoma cruzi that Is Predominantly Trypomastigote-Stage Specific and Secreted to the Medium
Source: PLOS journal article supplement (doi:10.1371/journal.pone.0071192), 2013-07-29

OD TcTASV-C<sub>GST</sub> / OD GST

4

3

2

1

infected

non-infected

rabbit group

**strain / lineage**

- non-infected
- Awp / TcI
- CA-I / TcI
- K98 / TcI
- nd/ nd
- RA / TcVI
- Tul0 / TcI
- UP / nd
- Y / TcII

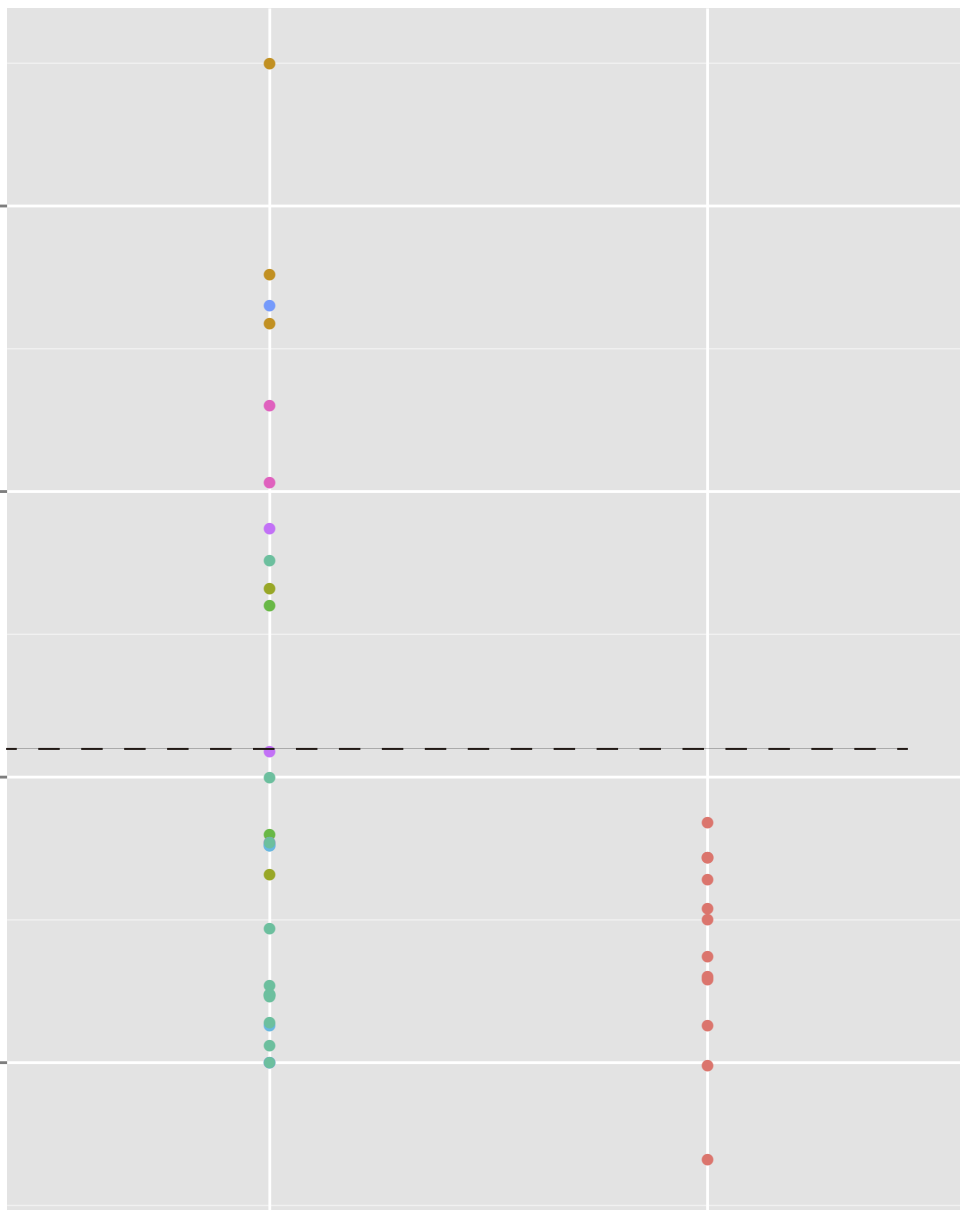

Supplement: S3 (10.1371/journal.pone.0071192.s003) [file journal.pone.0071192.s003]
